# Supplementary figures and images for: Determination of the differentiation capacities of murines' primary mononucleated cells and MC3T3-E1 cells
Source: Springer Nature journal article supplement (doi:10.1186/1475-2867-10-42), 2010-10-28

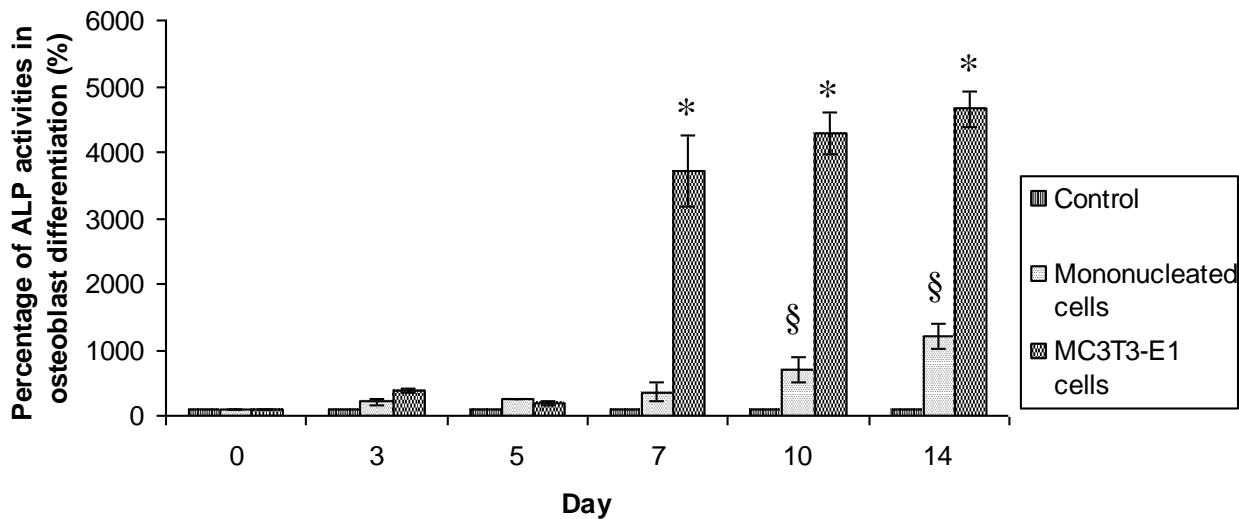

**A**

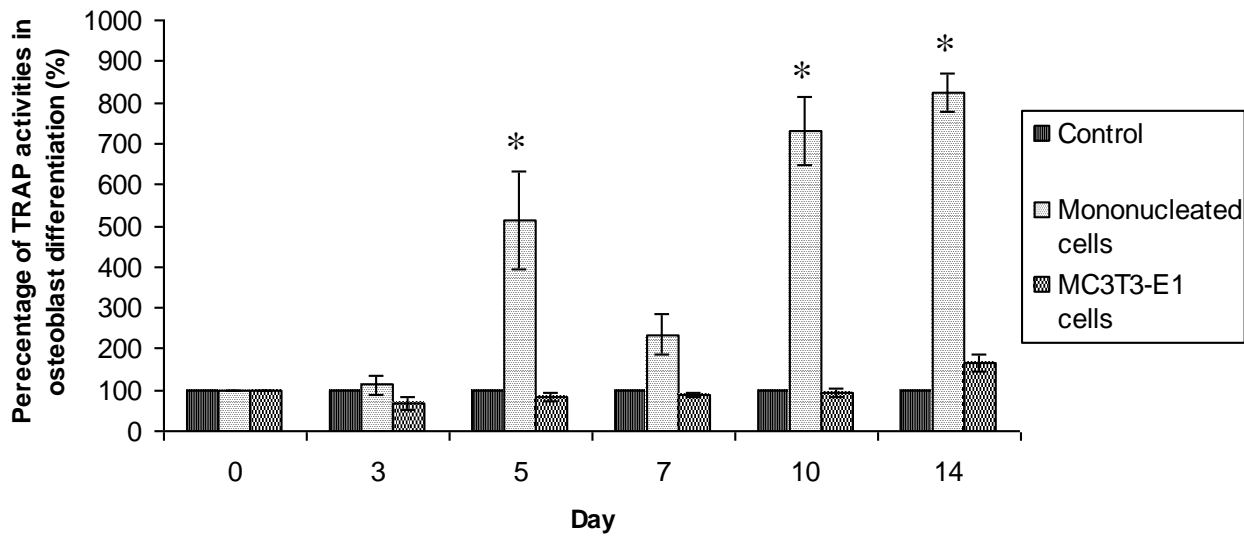

**B**

Supplement: 12935_2010_273_MOESM1_ESM.pdf [file 12935_2010_273_MOESM1_ESM.pdf]

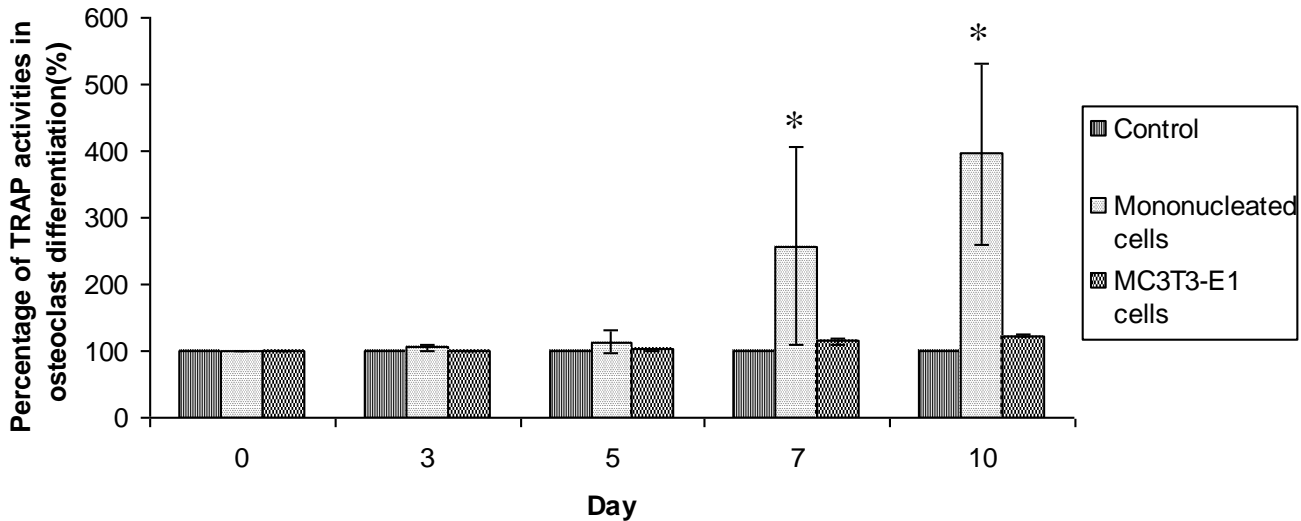

Supplement: 12935_2010_273_MOESM2_ESM.pdf [file 12935_2010_273_MOESM2_ESM.pdf]

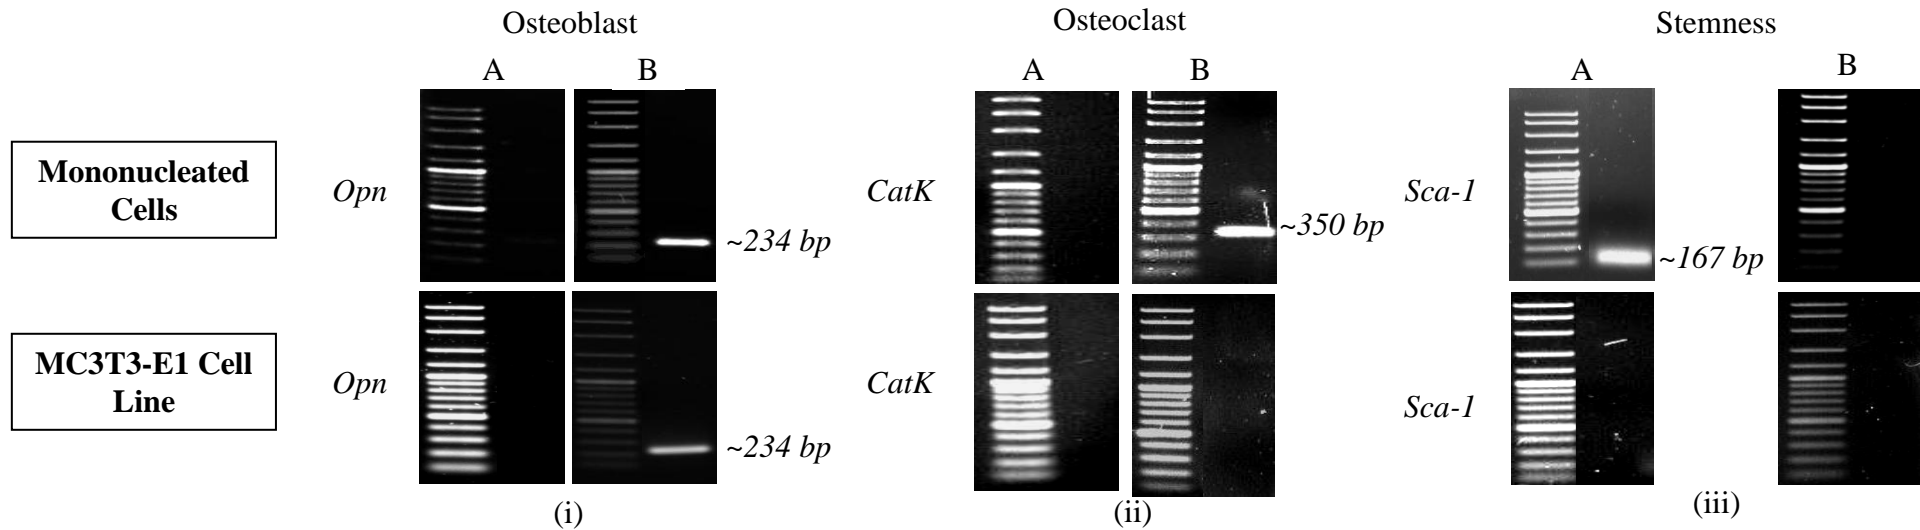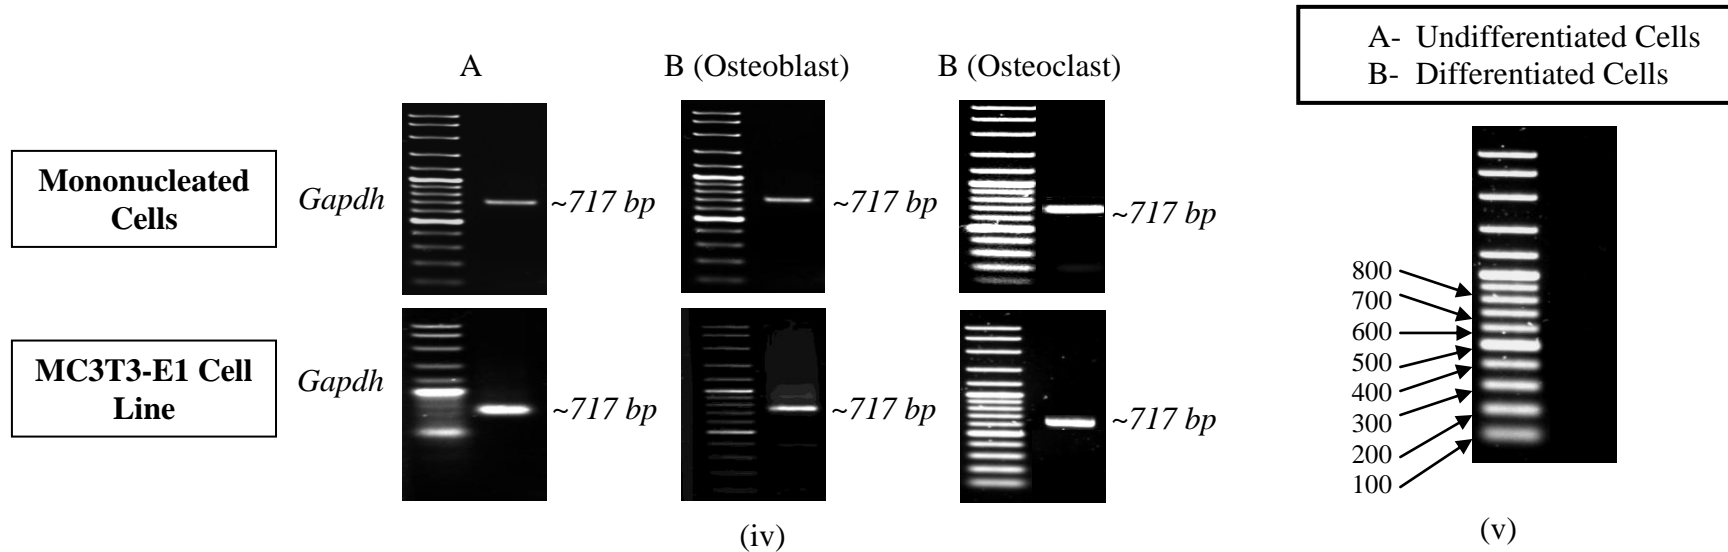

Supplement: 12935_2010_273_MOESM3_ESM.pdf [file 12935_2010_273_MOESM3_ESM.pdf]

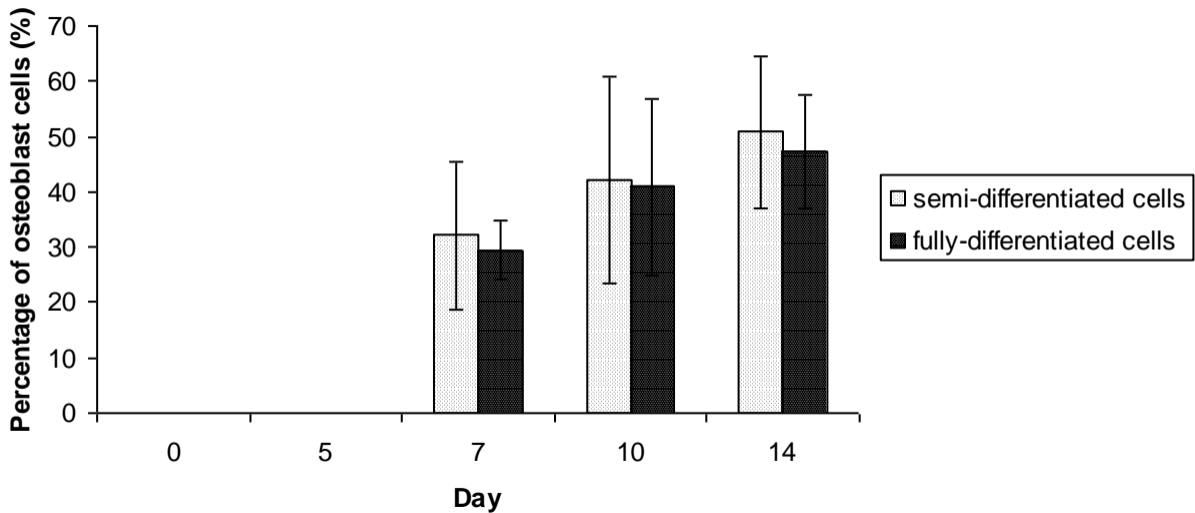

Supplement: 12935_2010_273_MOESM5_ESM.pdf [file 12935_2010_273_MOESM5_ESM.pdf]

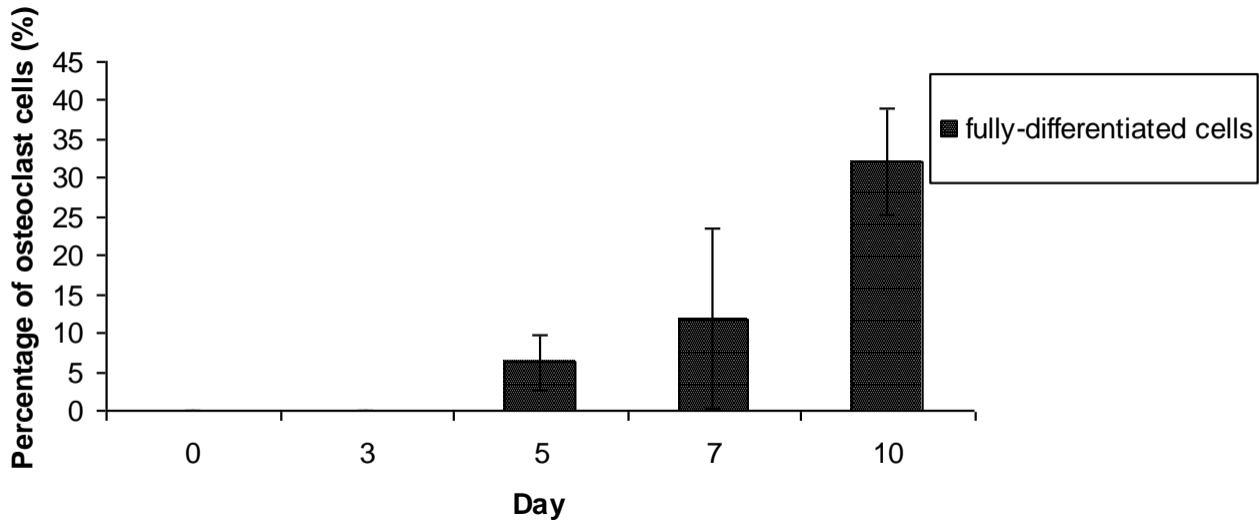

Supplement: 12935_2010_273_MOESM7_ESM.pdf [file 12935_2010_273_MOESM7_ESM.pdf]
